# Supplementary material for: Sex-specific differences of humoral immunity and transcriptome diversification in older adults vaccinated with inactivated quadrivalent influenza vaccines
Source: PubMed Central journal article supplement (PMC8064175; doi:10.18632/aging.202733), 2021-03-19
Supplement: aging-13-202733-s001.pdf [file aging-13-202733-s001.pdf]

## SUPPLEMENTARY FIGURES

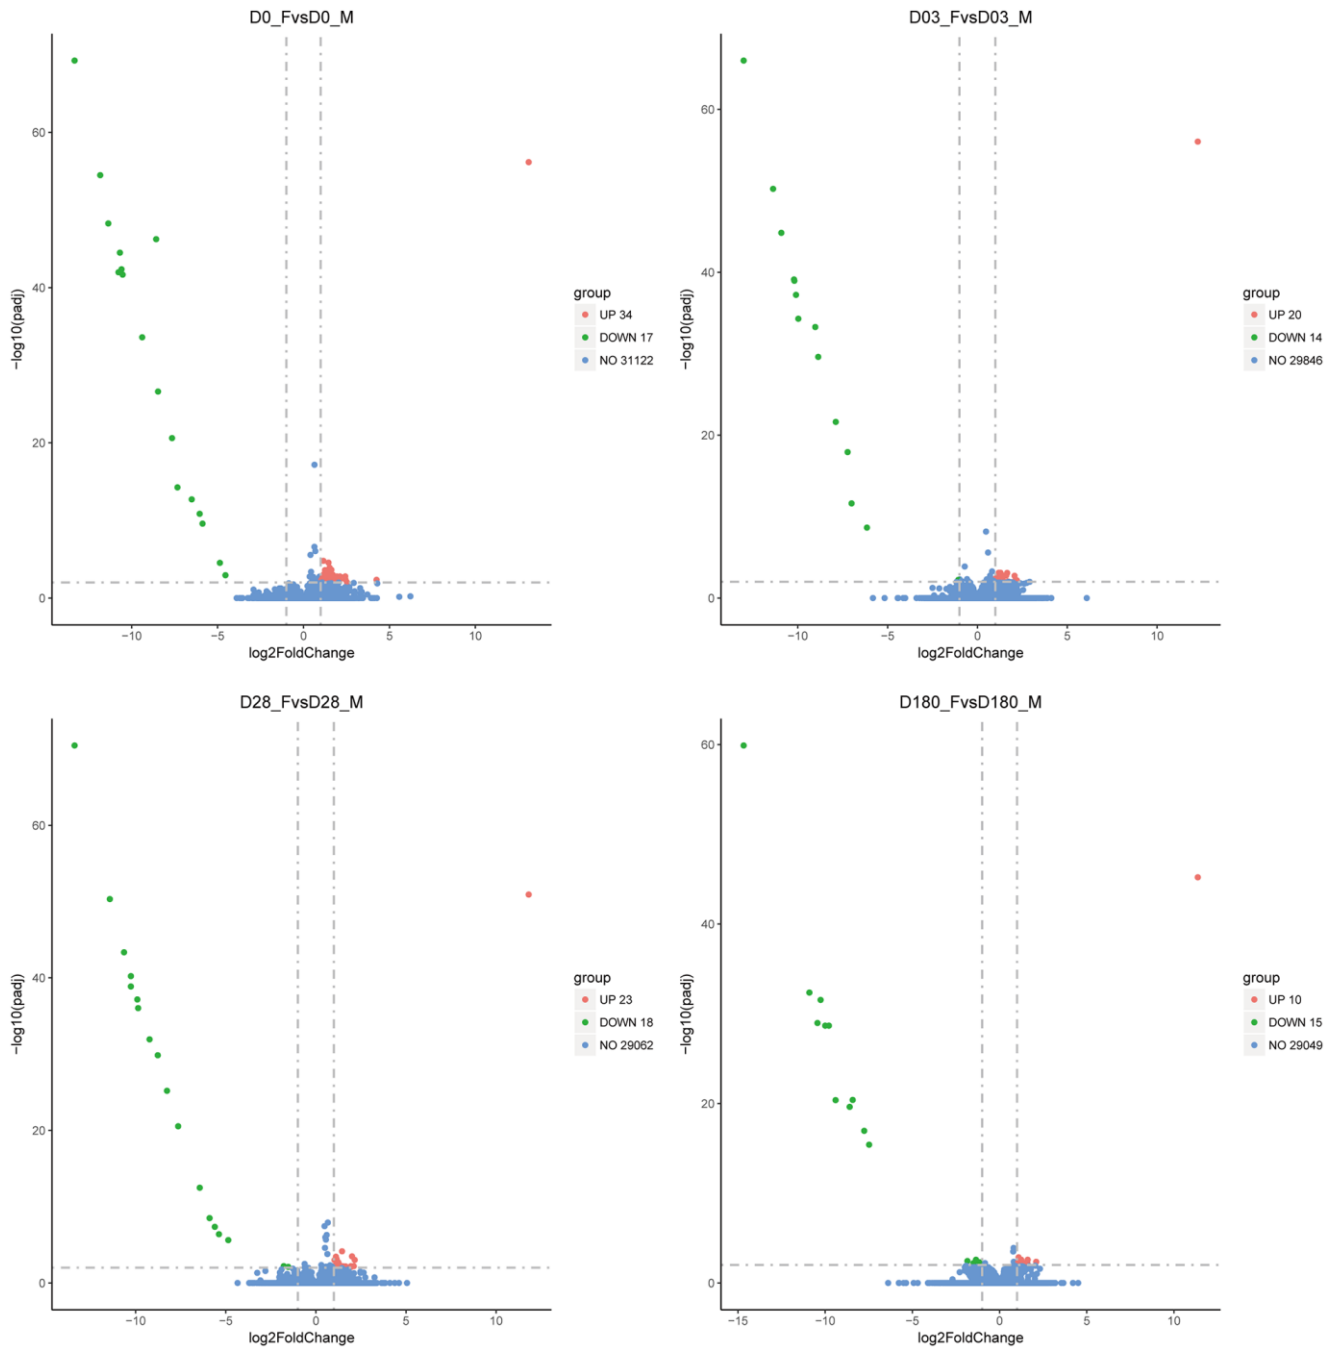

**Supplementary Figure 1. The volcano plots of the differentially expressed genes between females and males at four time points (Day 0, Day 3, Day 28, and Day 180).** The red dots represent the up-regulated genes, and the blue dots show the no significant-change genes, while the genes with significantly altered down-regulated expression are annotated as green. The threshold was set with rigorous value for the FDR (false discovery rate, padj) < 0.01 and  $|\log_2 \text{ fold change}| > 1$ . The x-axis denoted the fold changes of gene expression relative to baseline, showed with  $\log_2|\text{fold change}|$ , and the y-axis indicated the significance of the differential expressed genes.

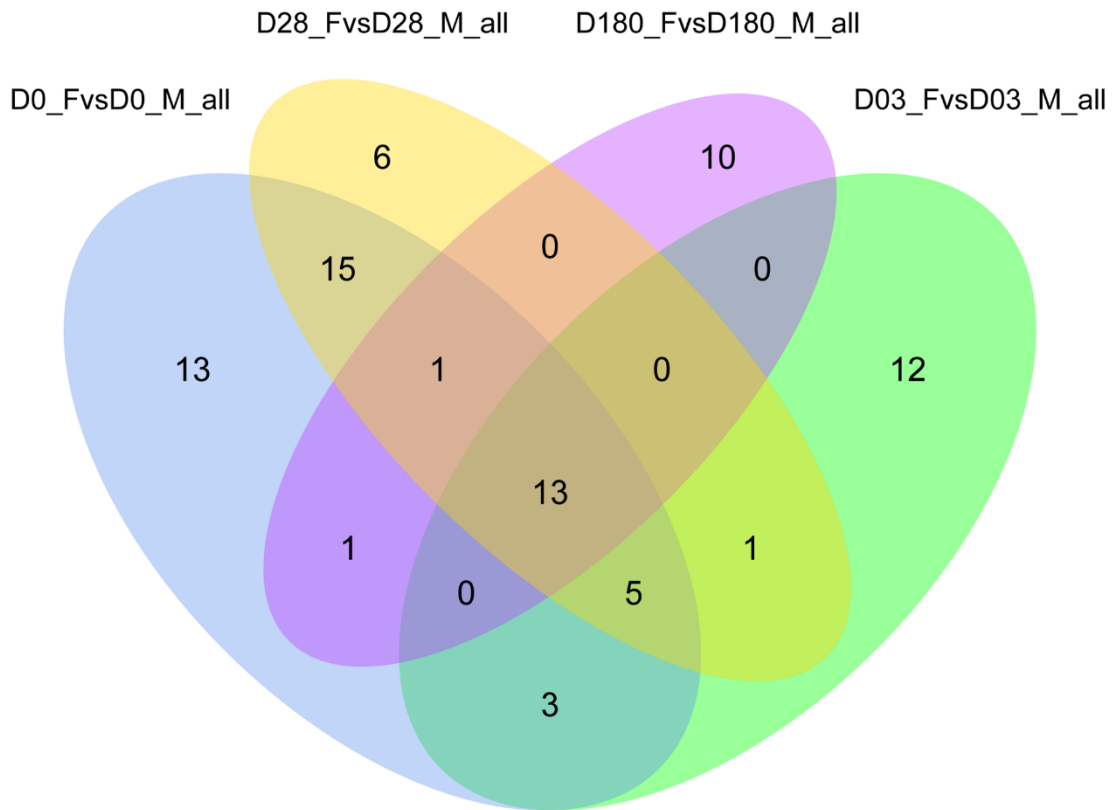

**Supplementary Figure 2.** The Venn diagram of the differentially expressed genes between females and males at four time points (Day 0, Day 3, Day 28, and Day 180).

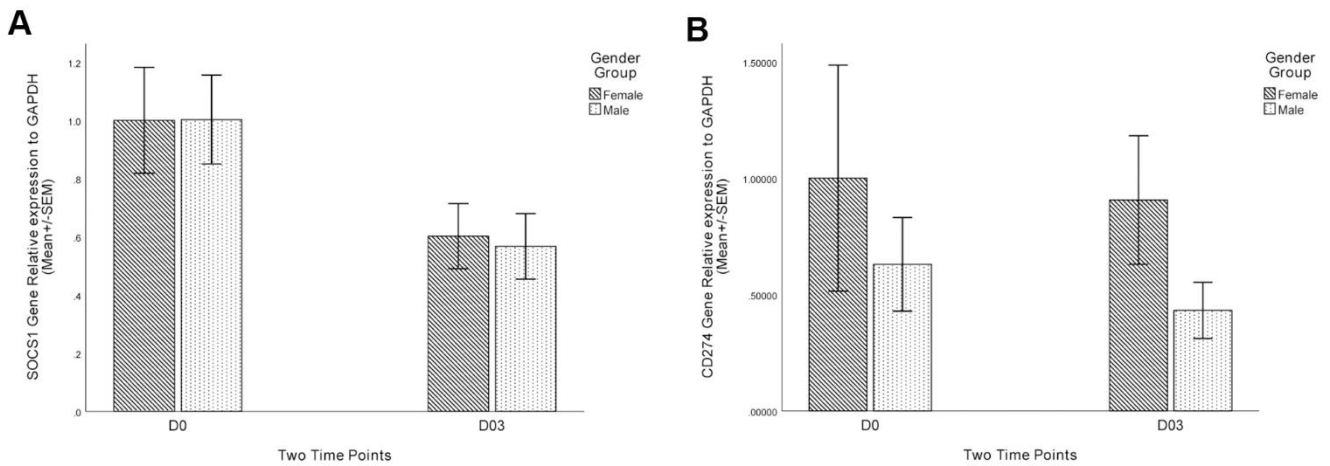

**Supplementary Figure 3.** Relative expression level of *SOCS1* (A) and *CD274* (B) genes between sex groups. The expression level of *GAPDH* was employed as an internal control. Each sample was detected in triplicate. Each bar and error bar represent Mean FC (fold-change) value and the Standard Error (SEM), respectively. Statistical significance was considered as  $p$ -value  $< 0.05$ .

COMPLEMENT AND COAGULATION CASCADES

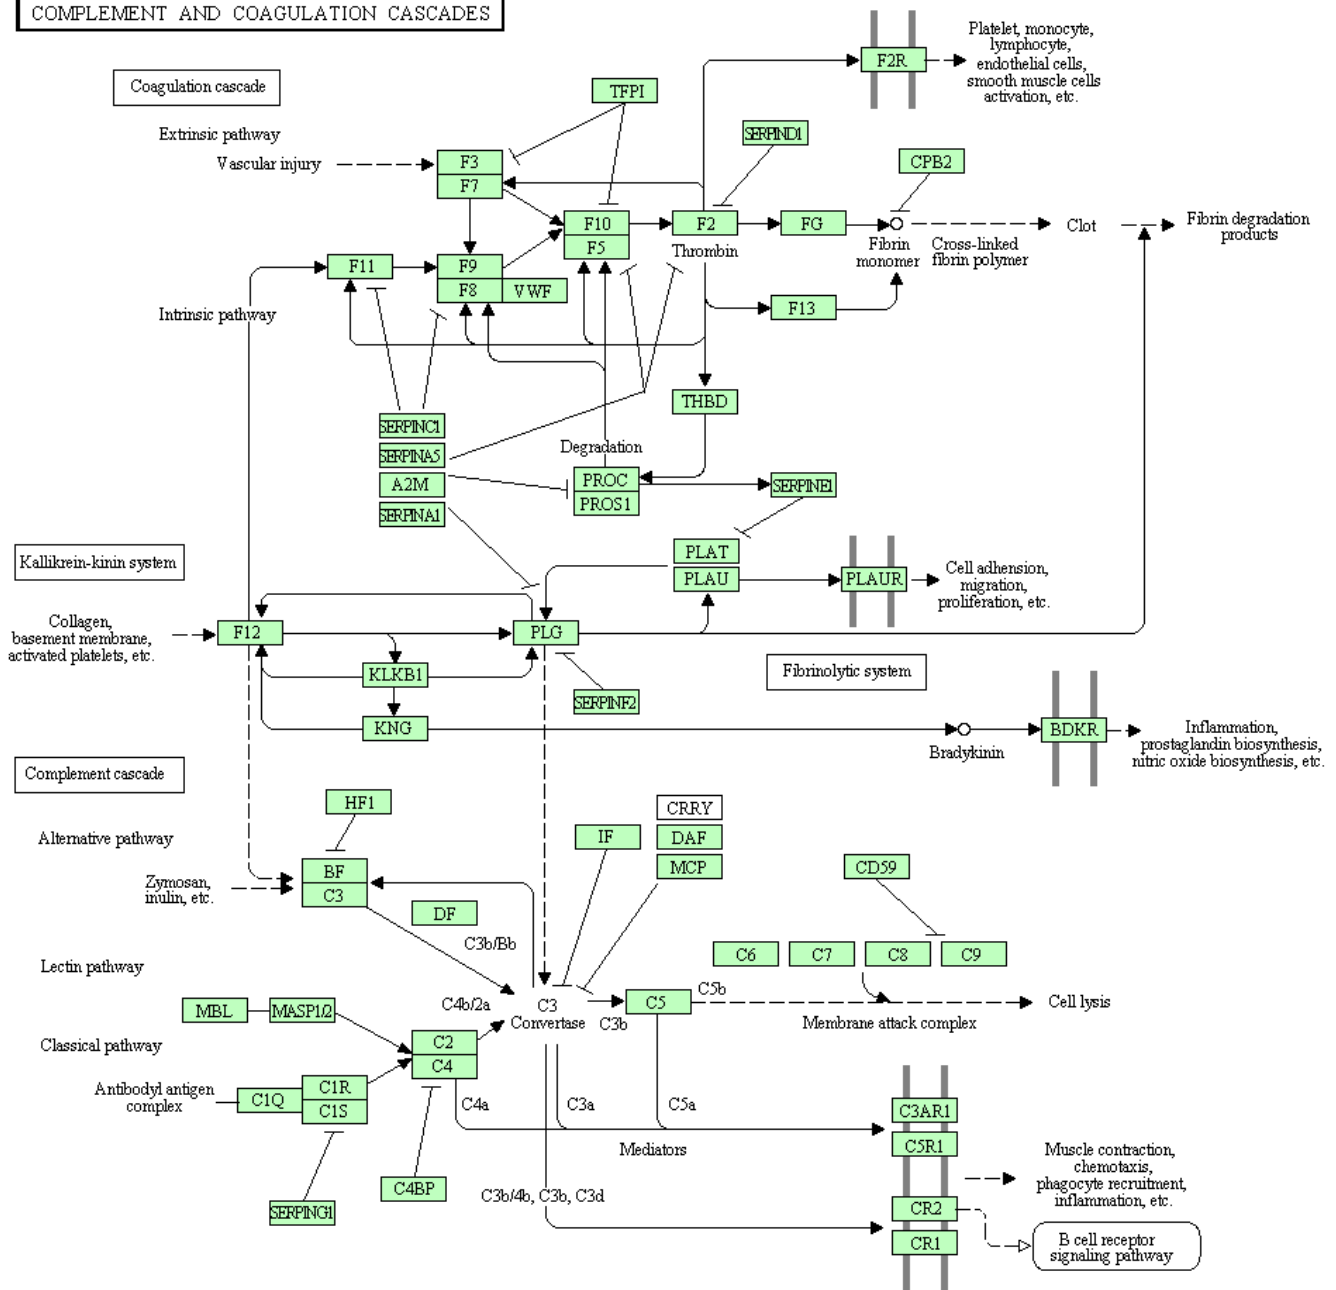

04610 4/3/09  
(c) Kanehisa Laboratories

Supplementary Figure 4. Complement and coagulation cascades, hsa04610.
